# Supplementary material
Source: PubMed Central journal article supplement (PMC3767982)

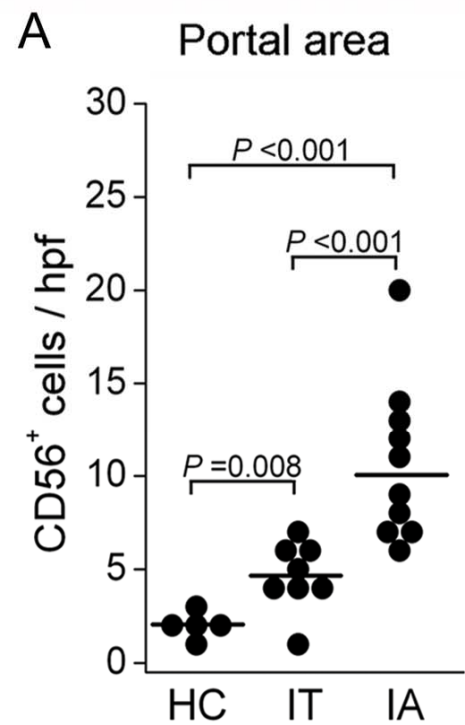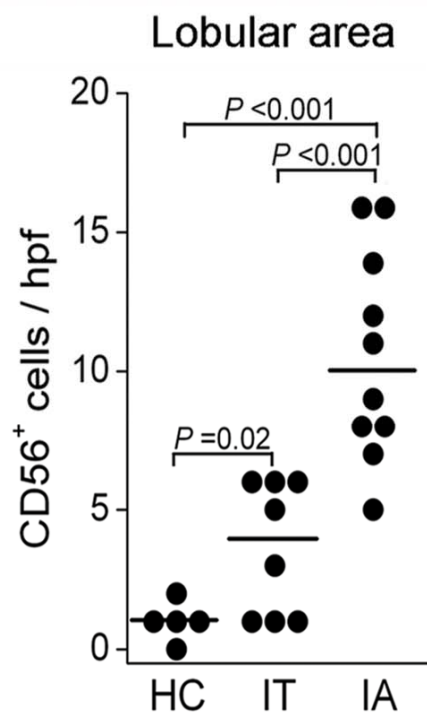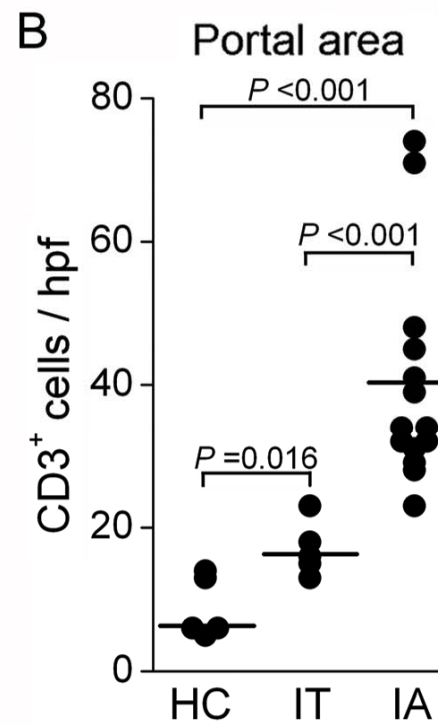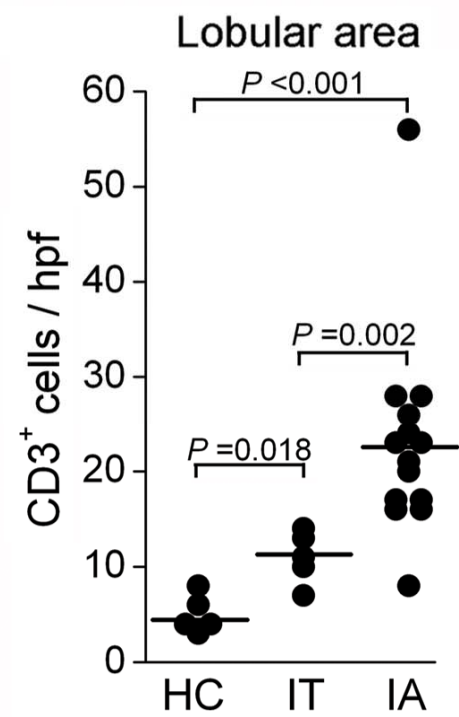

Supplement: NIHMS499493-supplement-supporting_Fig__1.pdf [file NIHMS499493-supplement-supporting_Fig__1.pdf]

Gate 1

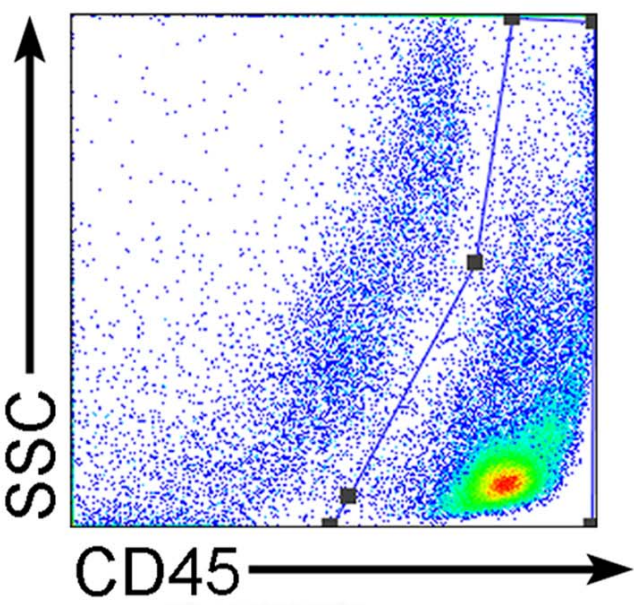

Gate 2

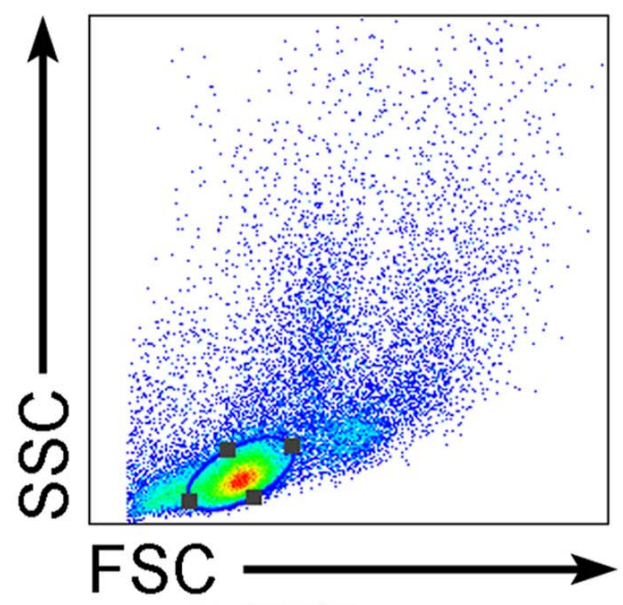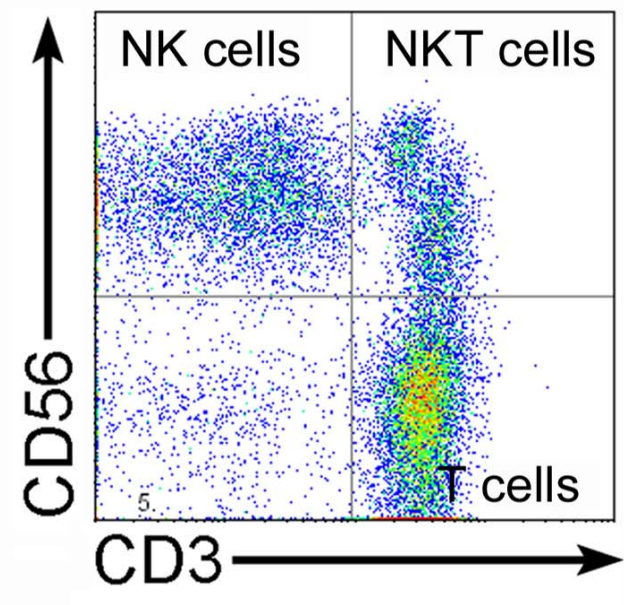

Supplement: NIHMS499493-supplement-supporting_Fig__2.pdf [file NIHMS499493-supplement-supporting_Fig__2.pdf]

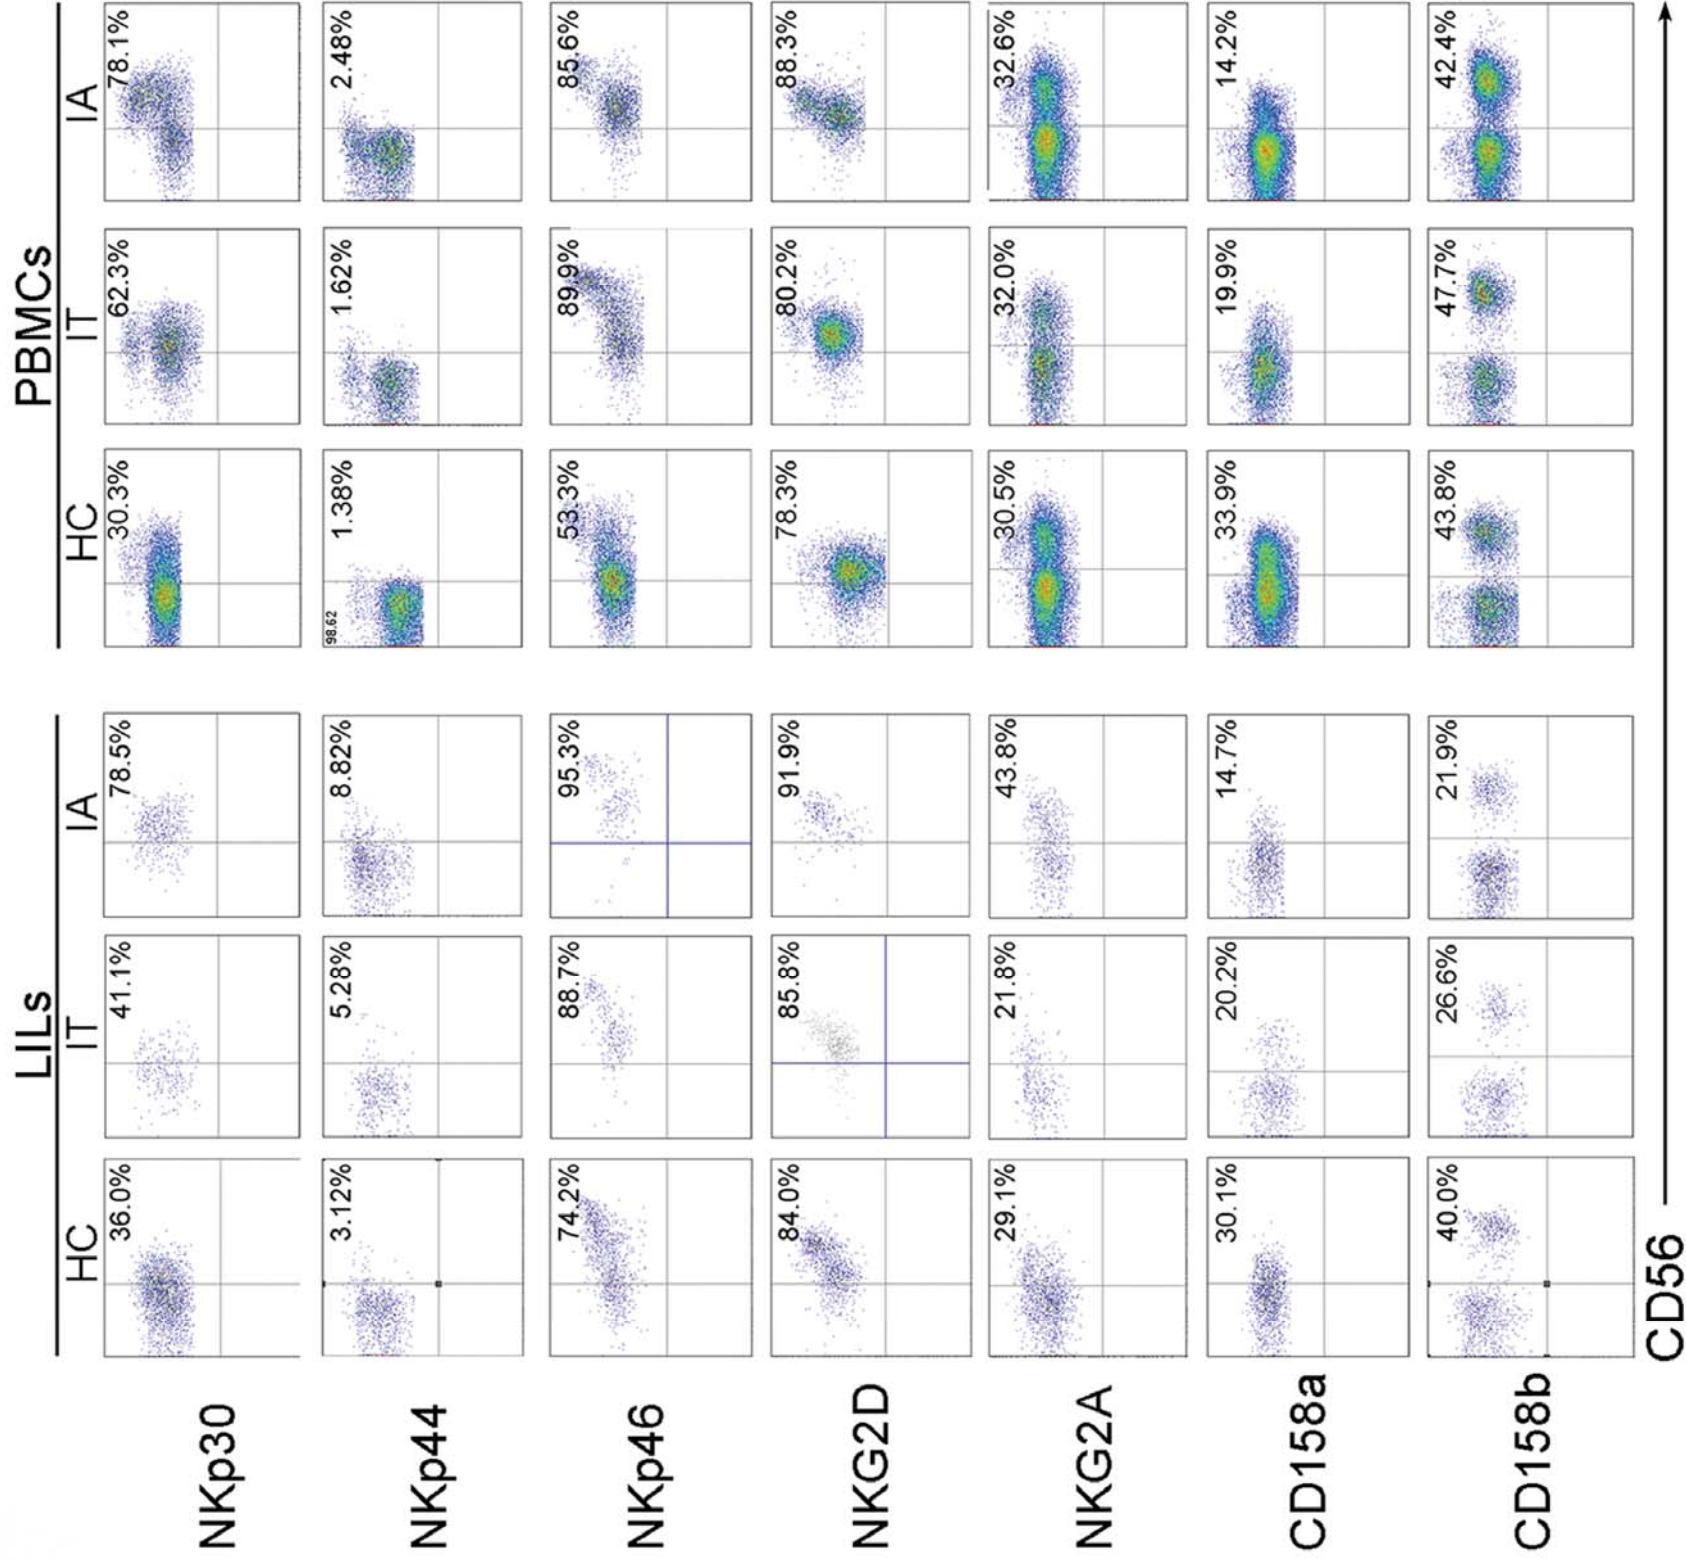

Supplement: NIHMS499493-supplement-supporting_Fig__3.pdf [file NIHMS499493-supplement-supporting_Fig__3.pdf]

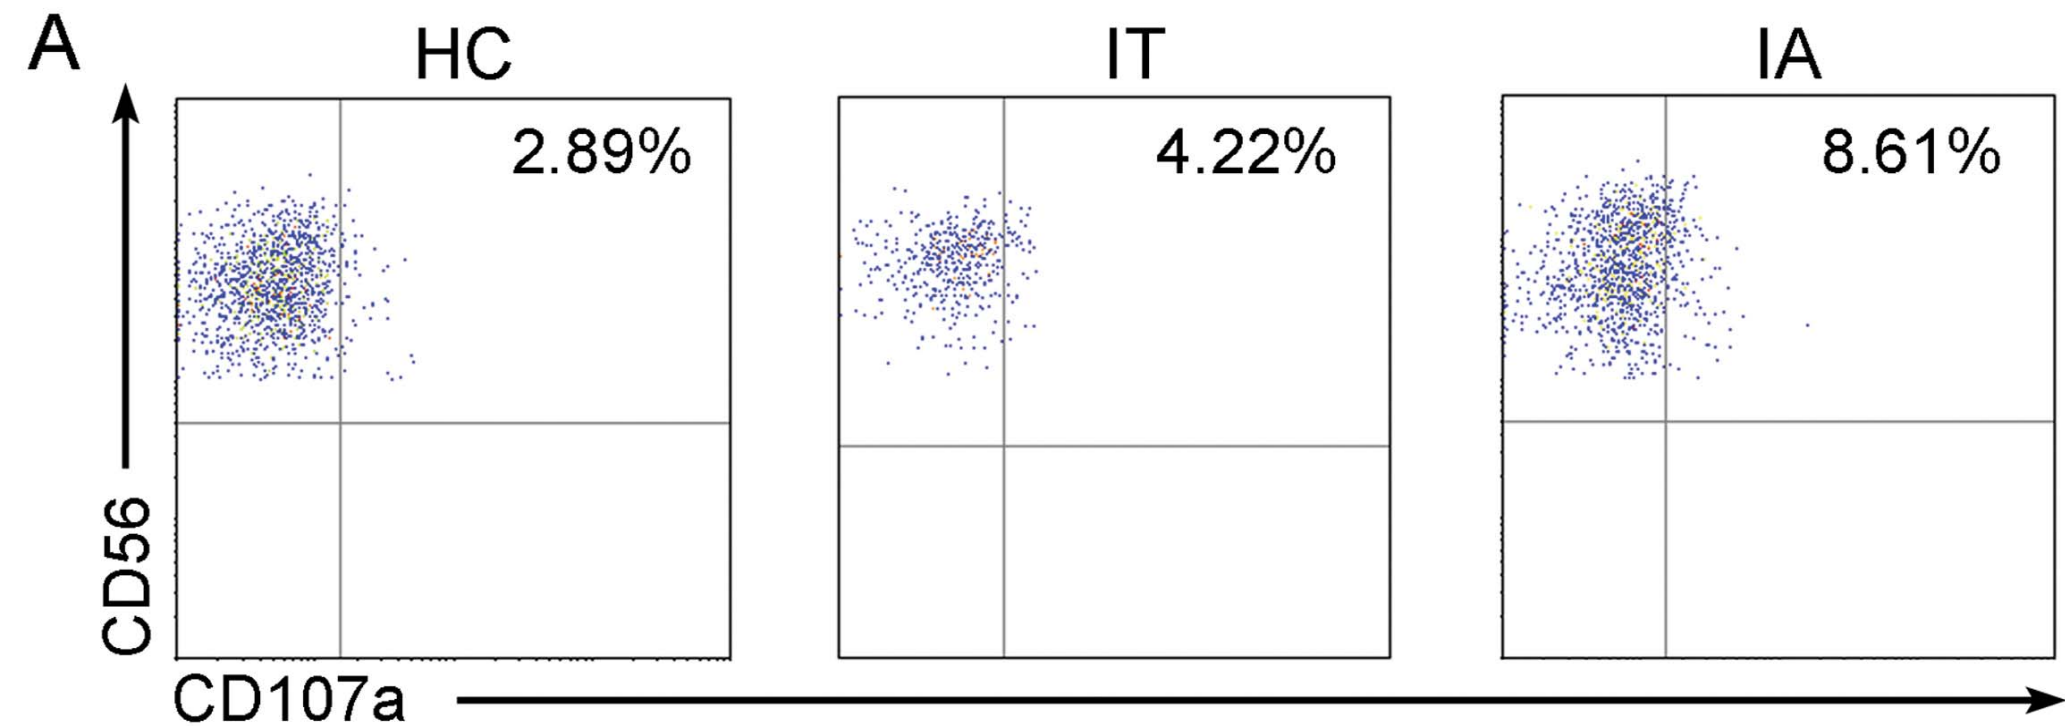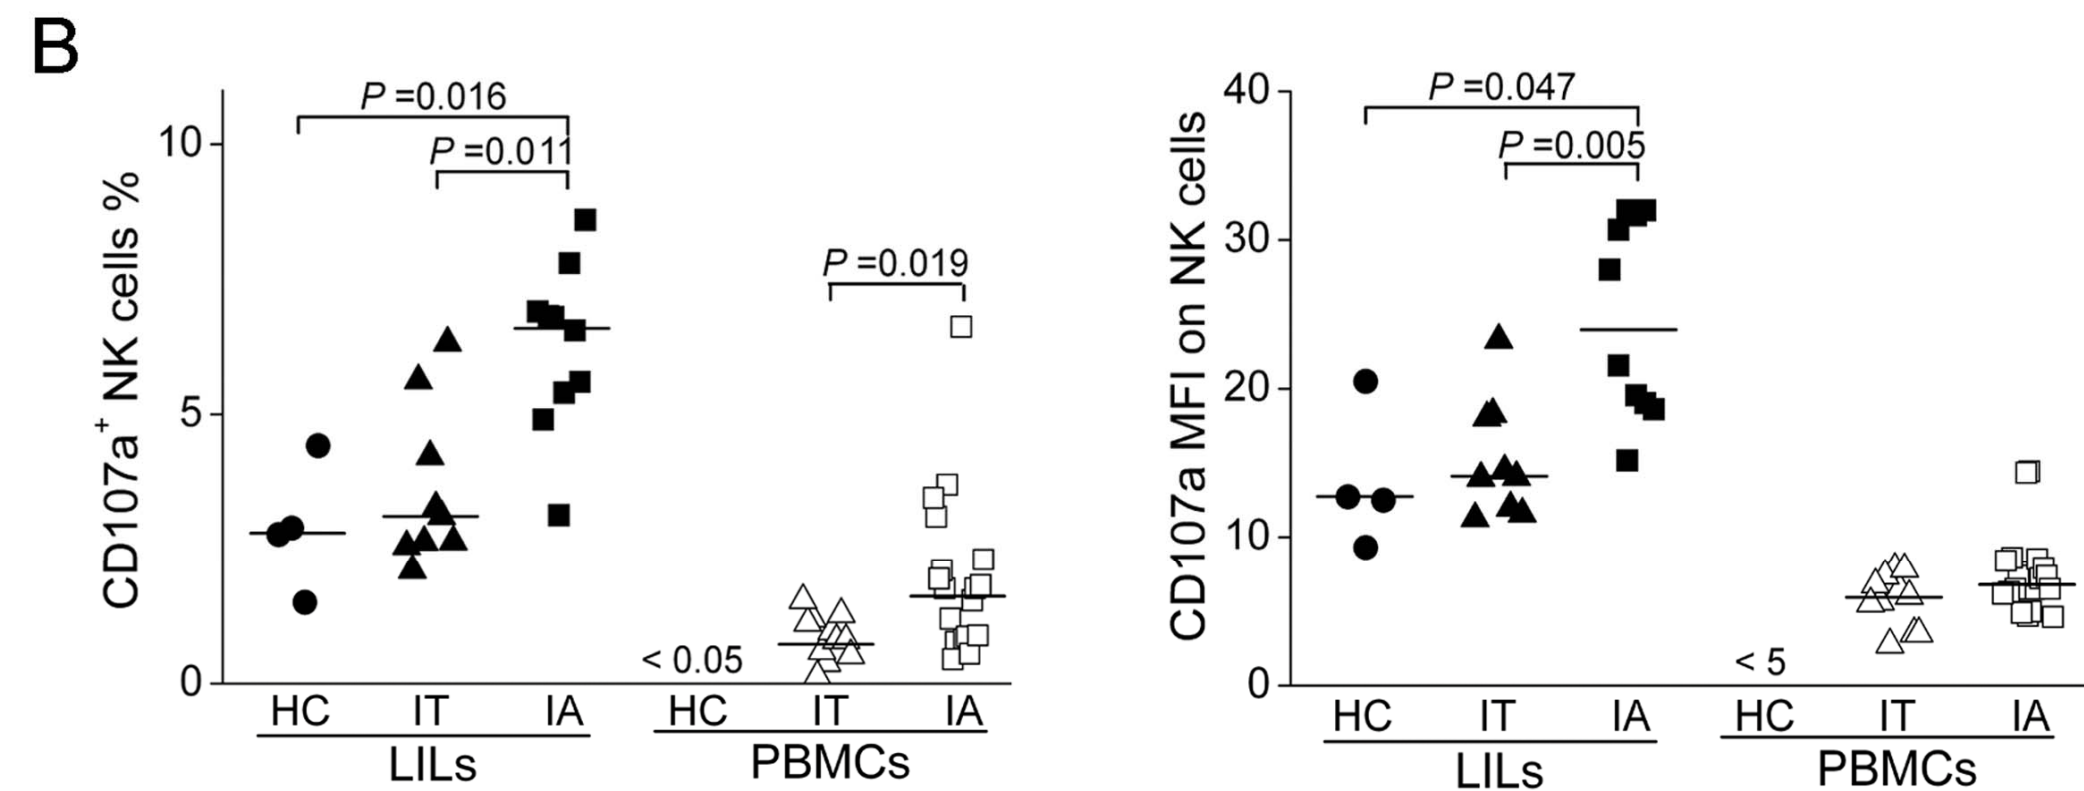

Supplement: NIHMS499493-supplement-supporting_Fig__4.pdf [file NIHMS499493-supplement-supporting_Fig__4.pdf]

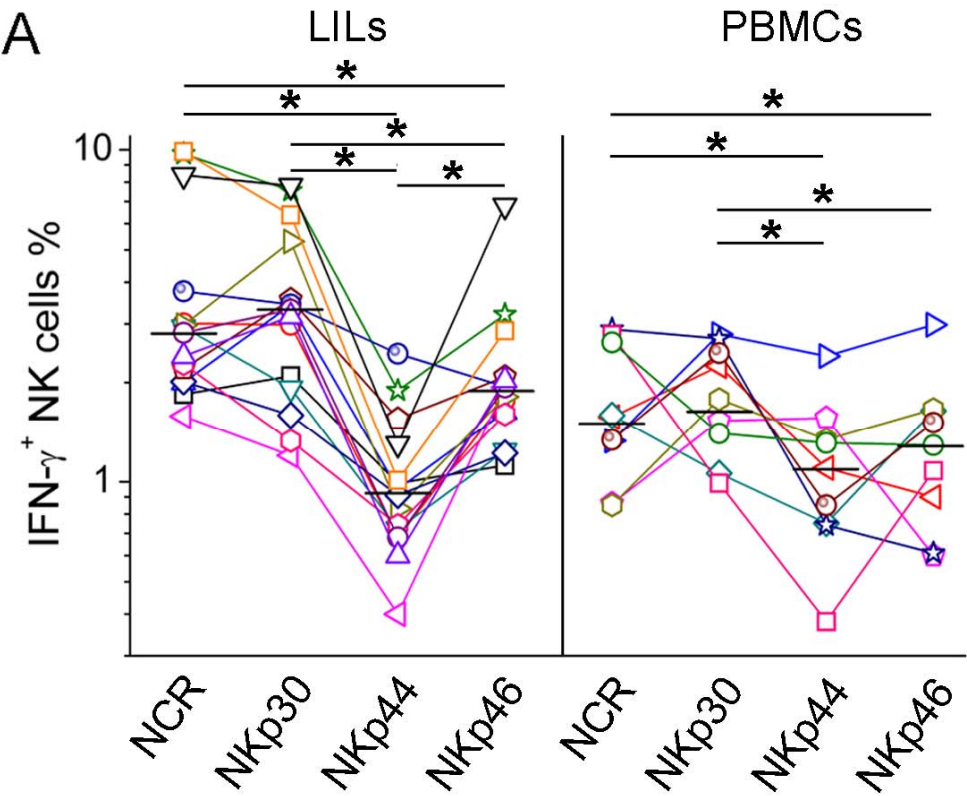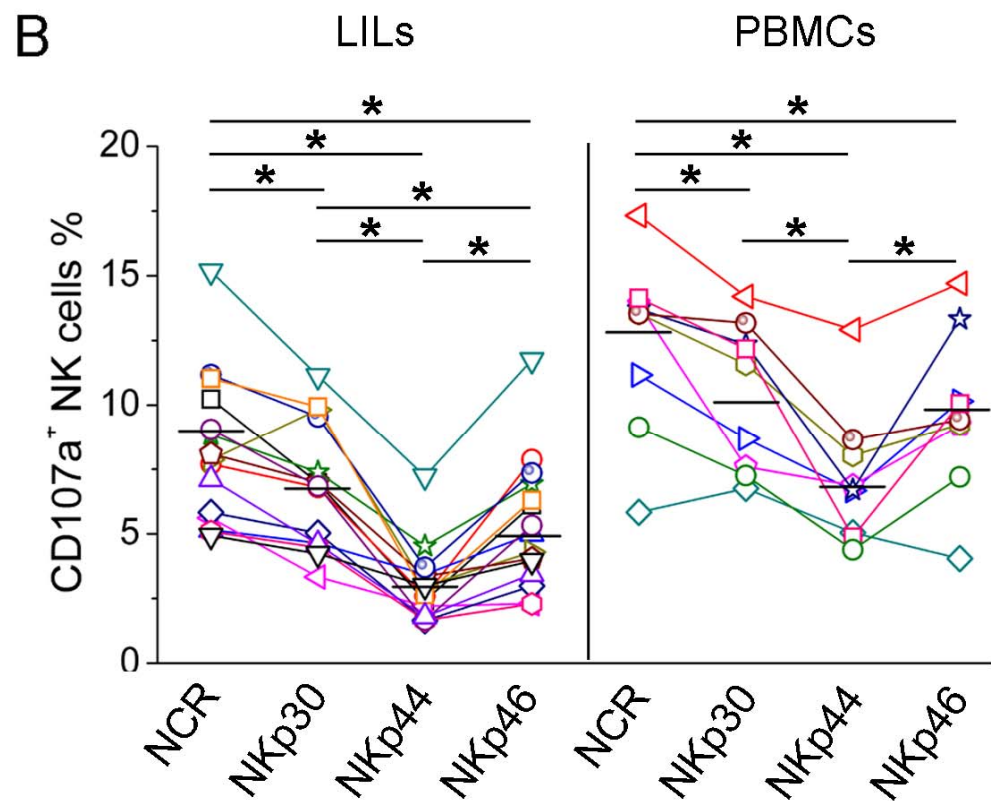

Supplement: NIHMS499493-supplement-supporting_Fig__5.pdf [file NIHMS499493-supplement-supporting_Fig__5.pdf]

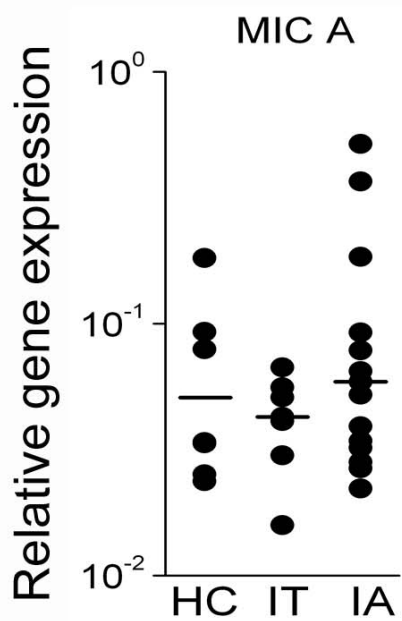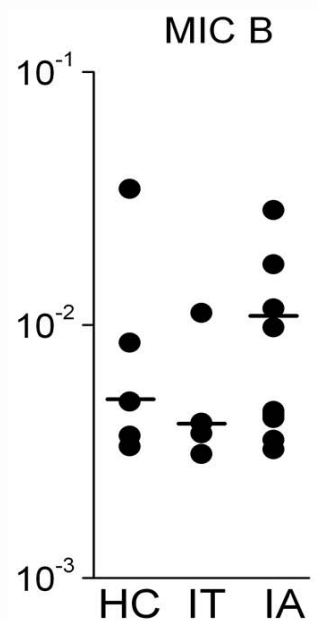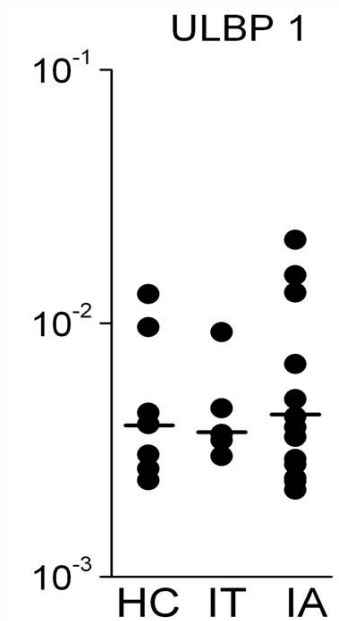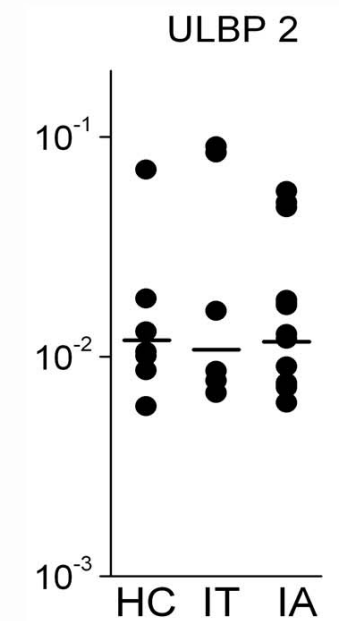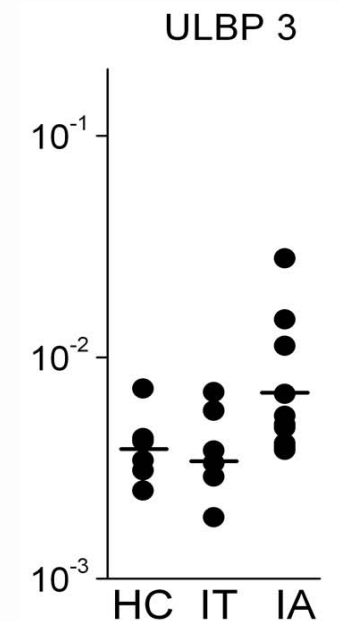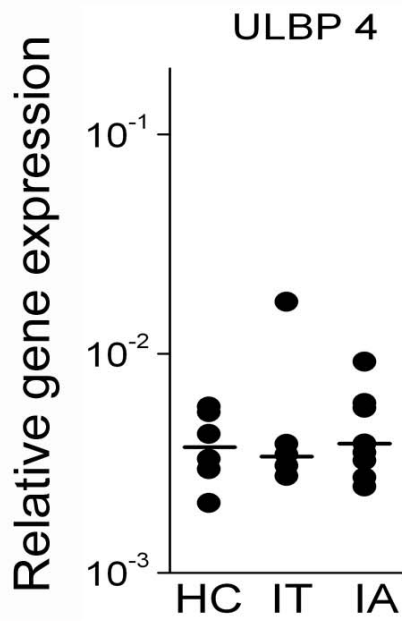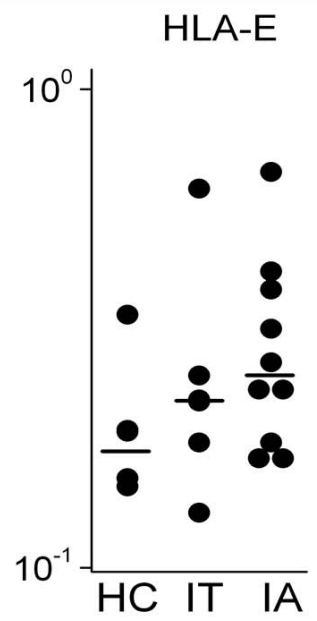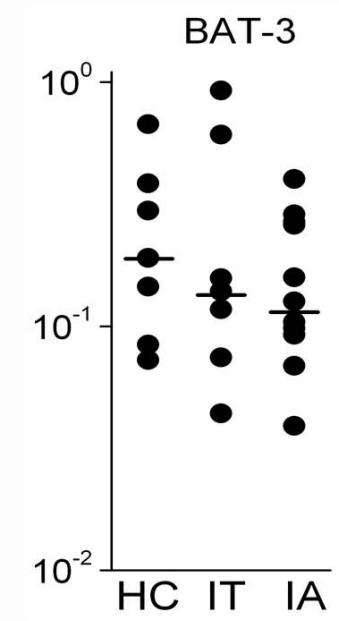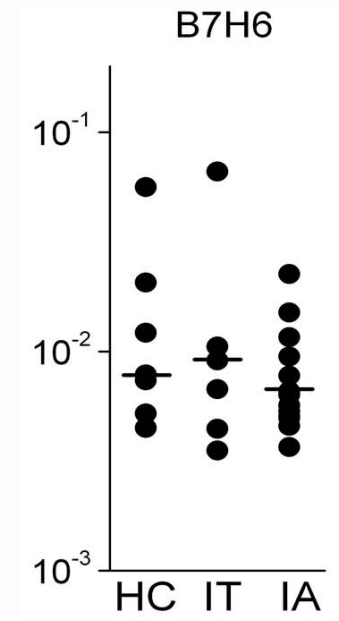

Supplement: NIHMS499493-supplement-supporting_Fig__6.pdf [file NIHMS499493-supplement-supporting_Fig__6.pdf]
